# Supplementary material
Source: MDPI journal article supplement (https://www.mdpi.com/2225-1146/11/1/7)
Supplement: s1 [file s1]

*Supporting file to*  
**Causal Vector Autoregression Enhanced with Covariance and Order  
Selection**

**Fitting the  $CVAR(p)$  model with  $p$  giving the optimal criteria, for the financial data spanning the first 200 days**

*Unrestricted  $CVAR(p)$  model:* The RMSE of the model fit is 0.00075 for  $p = 1$  and 0.00073 for  $p = 2$ .

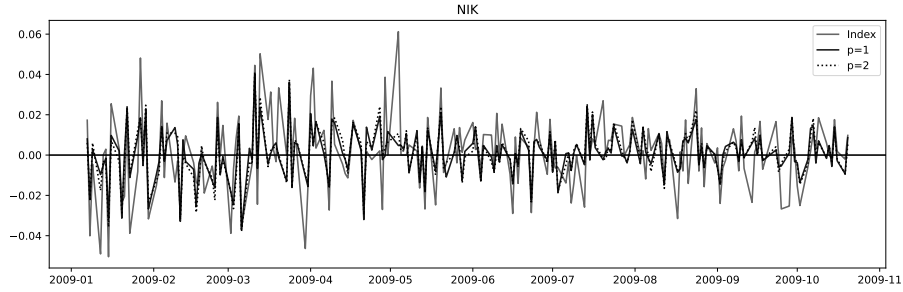

Figure 1: Fitting of NIK, component-wise RMSE is 0.00986 for  $p = 1$  and 0.00976 for  $p = 2$ .

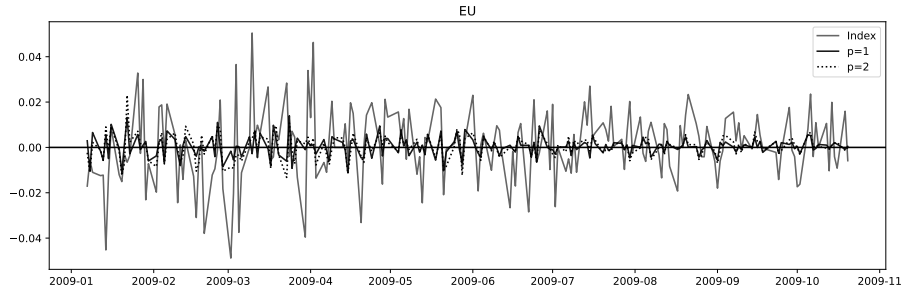

Figure 2: Fitting of EU, component-wise RMSE is 0.00265 for  $p = 1$  and 0.00261 for  $p = 2$ .

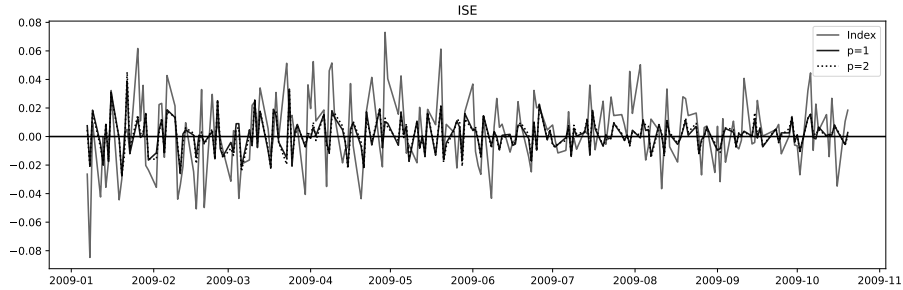

Figure 3: Fitting of ISE, component-wise RMSE is 0.01335 for  $p = 1$  and 0.01329 for  $p = 2$ .

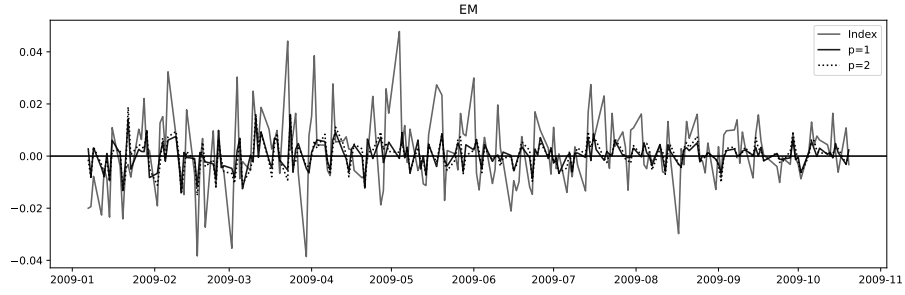

Figure 4: Fitting of EM, component-wise RMSE is 0.00575 for  $p = 1$  and 0.00560 for  $p = 2$ .

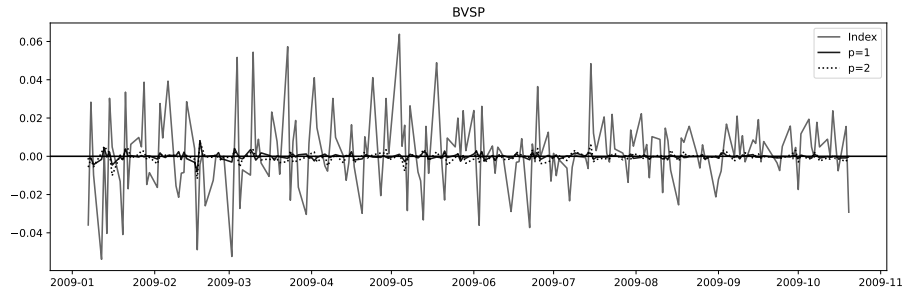

Figure 5: Fitting of BVSP, component-wise RMSE is 0.01037 for  $p = 1$  and 0.01026 for  $p = 2$ .

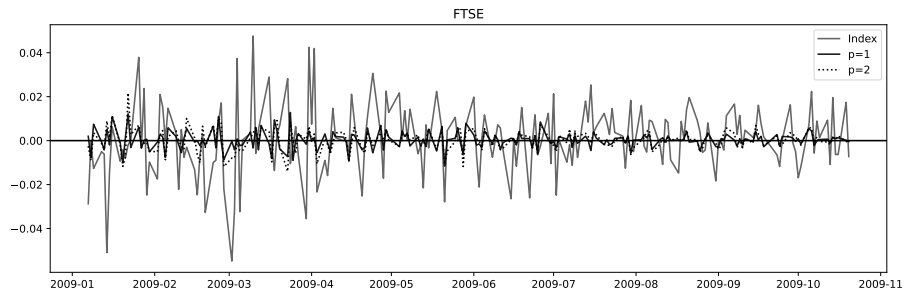

Figure 6: Fitting of FTSE, component-wise RMSE is 0.00607 for  $p = 1$  and 0.00589 for  $p = 2$ .

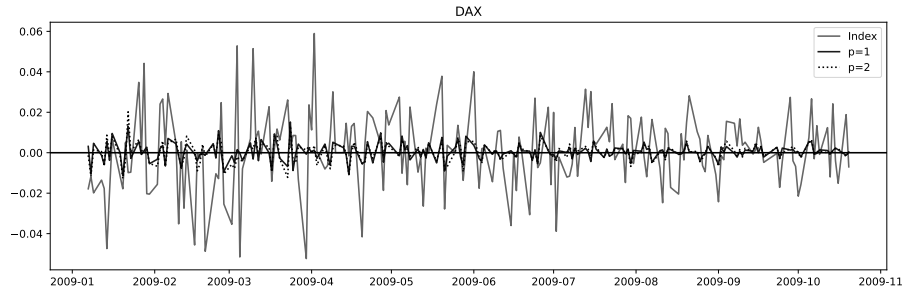

Figure 7: Fitting of DAX, component-wise RMSE is 0.00985 for  $p = 1$  and 0.00958 for  $p = 2$ .

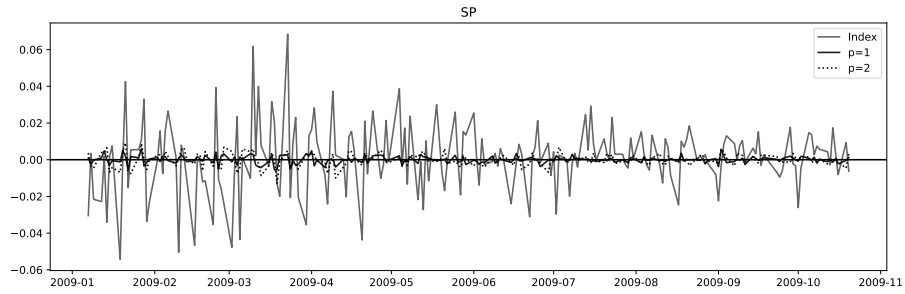

Figure 8: Fitting of SP, component-wise RMSE is 0.01400 for  $p = 1$  and 0.01384 for  $p = 2$ .

*Restricted CVAR(p) model:* The RMSE of the model fit is 0.00148 for  $p = 1$  and 0.00185 for  $p = 4$ .

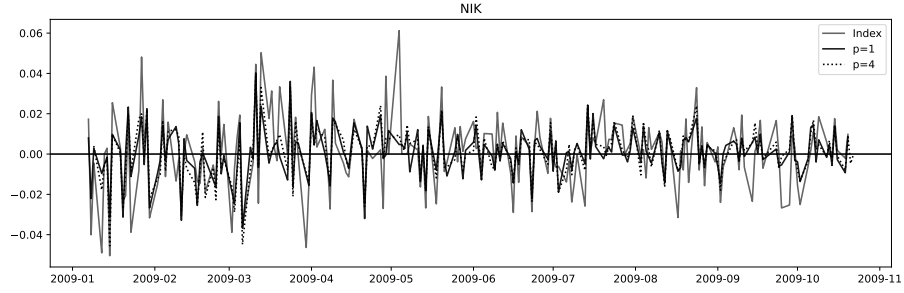

Figure 9: Fitting of NIK, component-wise RMSE is 0.01360 for  $p = 1$  and 0.01473 for  $p = 4$ .

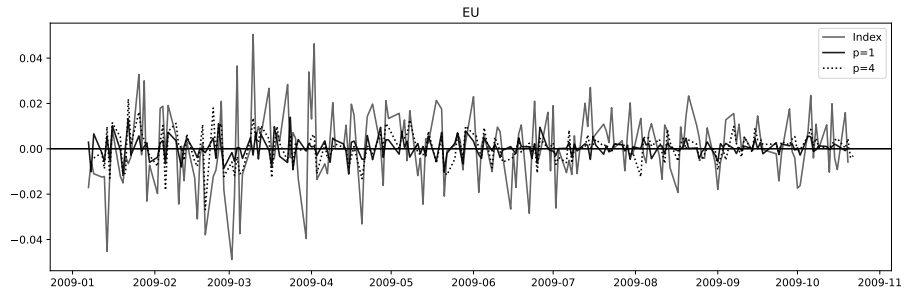

Figure 10: Fitting of EU, component-wise RMSE is 0.01269 for  $p = 1$  and 0.01246 for  $p = 4$ .

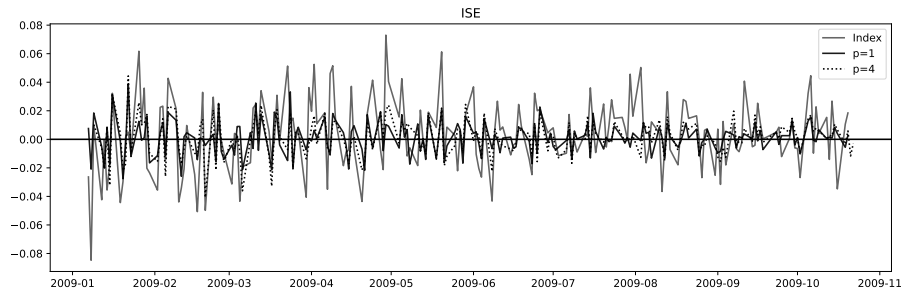

Figure 11: Fitting of ISE, component-wise RMSE is 0.00936 for  $p = 1$  and 0.01225 for  $p = 4$ .

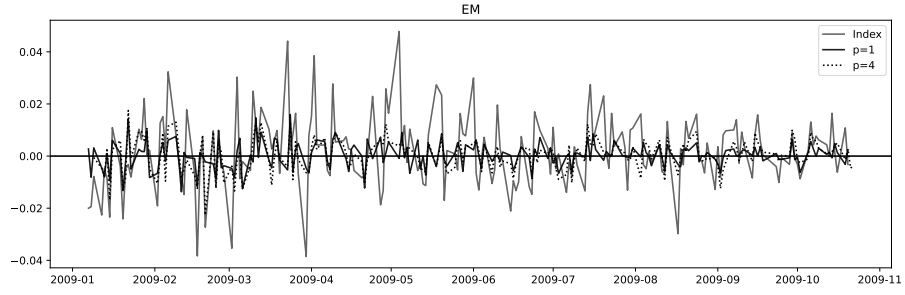

Figure 12: Fitting of EM, component-wise RMSE is 0.00875 for  $p = 1$  and 0.00961 for  $p = 4$ .

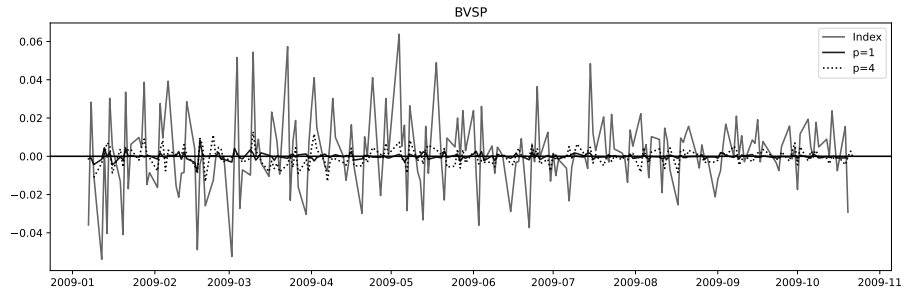

Figure 13: Fitting of BVSP, component-wise RMSE is 0.01351 for  $p = 1$  and 0.01397 for  $p = 4$ .

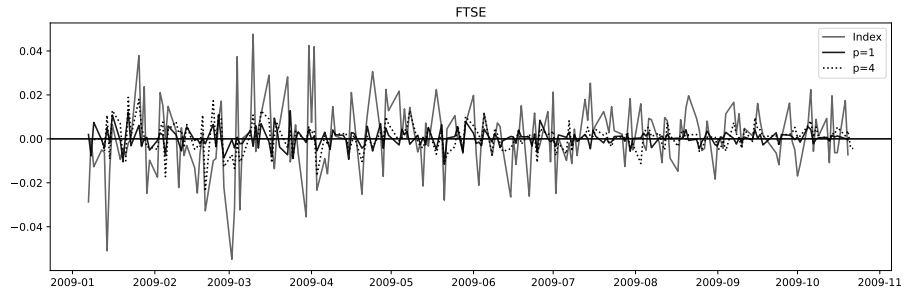

Figure 14: Fitting of FTSE, component-wise RMSE is 0.01037 for  $p = 1$  and 0.01097 for  $p = 4$ .

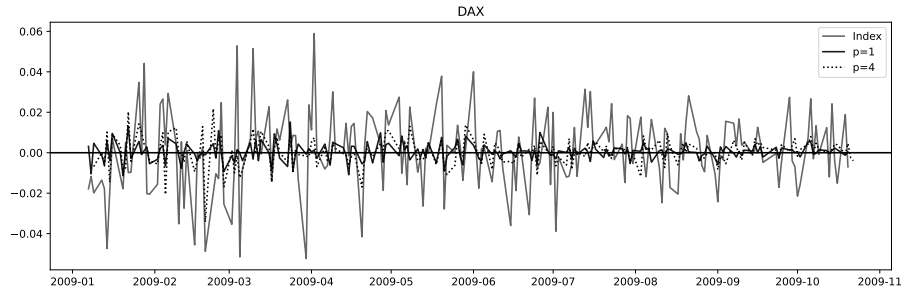

Figure 15: Fitting of DAX, component-wise RMSE is 0.02049 for  $p = 1$  and 0.02331 for  $p = 4$ .

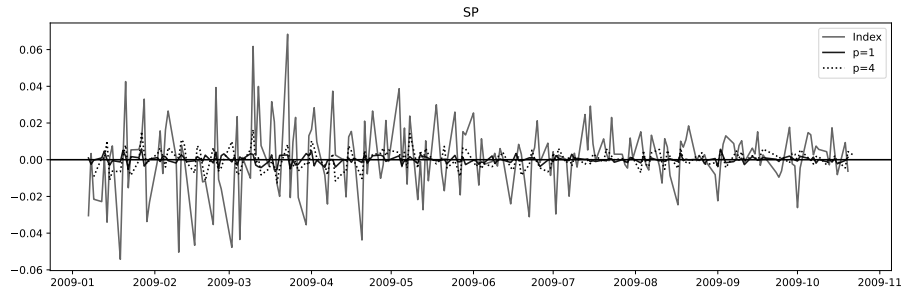

Figure 16: Fitting of SP, component-wise RMSE is 0.01598 for  $p = 1$  and 0.01613 for  $p = 4$ .
