# Supplementary material
Source: MDPI journal article supplement (https://www.mdpi.com/2225-1146/11/1/7)
Supplement: s1 [file s1]

*Supporting file to*  
**Causal Vector Autoregression Enhanced with Covariance and Order Selection**

**Estimated parameter matrices in the unrestricted causal VAR( $p$ ) models ( $p = 3, 4, 5$ ) for the financial data**

|      | NIK | EU      | ISE     | EM      | BVSP    | DAX     | FTSE    | SP      |
|------|-----|---------|---------|---------|---------|---------|---------|---------|
| NIK  | 1   | -0.0124 | 0.0114  | -0.8830 | 0.1977  | 0.0248  | 0.1104  | -0.0361 |
| EU   | 0   | 1       | -0.0436 | -0.0055 | -0.0263 | -0.3768 | -0.5116 | -0.0119 |
| ISE  | 0   | 0       | 1       | -0.9742 | 0.1594  | -0.1423 | -0.3486 | -0.1245 |
| EM   | 0   | 0       | 0       | 1       | -0.3557 | -0.1057 | -0.2304 | 0.0914  |
| BVSP | 0   | 0       | 0       | 0       | 1       | -0.0141 | -0.2771 | -0.6434 |
| DAX  | 0   | 0       | 0       | 0       | 0       | 1       | -0.8207 | -0.2223 |
| FTSE | 0   | 0       | 0       | 0       | 0       | 0       | 1       | -0.6369 |
| SP   | 0   | 0       | 0       | 0       | 0       | 0       | 0       | 1       |

Table 1:  $\mathbf{A}$  for the unrestricted Financial VAR(3) model (rounded to 4 decimals).

|      | NIK <sub>-1</sub> | EU <sub>-1</sub> | ISE <sub>-1</sub> | EM <sub>-1</sub> | BVSP <sub>-1</sub> | DAX <sub>-1</sub> | FTSE <sub>-1</sub> | SP <sub>-1</sub> |
|------|-------------------|------------------|-------------------|------------------|--------------------|-------------------|--------------------|------------------|
| NIK  | 0.2103            | -0.1510          | -0.1084           | 0.0964           | 0.0705             | 0.0147            | -0.1487            | -0.2816          |
| EU   | -0.0052           | 0.1500           | -0.0023           | 0.0262           | -0.0183            | -0.0424           | -0.1021            | -0.0123          |
| ISE  | 0.0361            | 0.2760           | -0.0809           | 0.2479           | -0.2691            | -0.0467           | -0.0092            | -0.1292          |
| EM   | 0.0471            | -0.0044          | -0.0067           | 0.1719           | -0.1296            | -0.1013           | 0.0316             | -0.1196          |
| BVSP | -0.0116           | 0.1013           | 0.0310            | -0.1612          | 0.1478             | -0.1755           | 0.1426             | -0.0900          |
| DAX  | -0.0148           | 0.2054           | -0.0306           | 0.0124           | -0.0386            | -0.0497           | -0.0996            | -0.0470          |
| FTSE | 0.0684            | 0.0259           | 0.0226            | 0.0561           | -0.1267            | 0.2303            | 0.1225             | -0.3792          |
| SP   | 0.0521            | 0.2681           | -0.0533           | -0.0128          | -0.0012            | -0.0959           | -0.3289            | 0.2110           |

Table 2:  $\mathbf{B}_1$  for the unrestricted Financial VAR(3) model (rounded to 4 decimals).

|      | NIK <sub>-2</sub> | EU <sub>-2</sub> | ISE <sub>-2</sub> | EM <sub>-2</sub> | BVSP <sub>-2</sub> | DAX <sub>-2</sub> | FTSE <sub>-2</sub> | SP <sub>-2</sub> |
|------|-------------------|------------------|-------------------|------------------|--------------------|-------------------|--------------------|------------------|
| NIK  | -0.0314           | -0.1852          | -0.0402           | 0.0232           | 0.0928             | -0.0222           | 0.1717             | -0.0466          |
| EU   | 0.0010            | 0.0927           | -0.0060           | 0.0064           | 0.0021             | 0.0200            | -0.0862            | -0.0437          |
| ISE  | -0.0050           | -0.1216          | -0.0260           | -0.0117          | 0.0243             | 0.0794            | 0.0630             | 0.0558           |
| EM   | 0.0141            | 0.0996           | -0.0226           | 0.1364           | -0.0915            | -0.1004           | -0.0454            | -0.0356          |
| BVSP | -0.0581           | -0.0143          | -0.0494           | 0.2097           | -0.0378            | -0.0022           | 0.0117             | 0.0036           |
| DAX  | -0.0399           | 0.0306           | 0.0107            | 0.0632           | -0.0467            | -0.0291           | -0.0321            | 0.0395           |
| FTSE | 0.0602            | 0.2642           | -0.0426           | 0.1073           | -0.0039            | 0.0533            | -0.0195            | -0.3782          |
| SP   | 0.0455            | -0.0563          | 0.0701            | -0.1983          | 0.0747             | 0.0042            | -0.1890            | 0.1686           |

Table 3:  $\mathbf{B}_2$  for the unrestricted Financial VAR(3) model (rounded to 4 decimals).

**Estimates of the concentration matrices with covariance selection**

The  $16 \times 16$  matrix  $\hat{\mathbf{K}}$ , estimated by using the lag 1 variables is shown in Table 16; while the  $24 \times 24$  matrix  $\hat{\mathbf{K}}$  by using the lag 1 and lag 2 variables is shown in Table 17, for the financial data. The  $12 \times 12$  matrix  $\hat{\mathbf{K}}$ , estimated by using the lag 1 variables is shown in Table 18, for the IMR data.

|      | NIK <sub>-3</sub> | EU <sub>-3</sub> | ISE <sub>-3</sub> | EM <sub>-3</sub> | BVSP <sub>-3</sub> | DAX <sub>-3</sub> | FTSE <sub>-3</sub> | SP <sub>-3</sub> |
|------|-------------------|------------------|-------------------|------------------|--------------------|-------------------|--------------------|------------------|
| NIK  | -0.0297           | -0.2926          | 0.0008            | -0.0113          | 0.0175             | 0.2452            | 0.1064             | -0.0991          |
| EU   | -0.0014           | 0.1035           | -0.0003           | -0.0318          | 0.0020             | -0.0176           | -0.0616            | -0.0128          |
| ISE  | -0.0703           | -0.0594          | 0.0117            | 0.2764           | -0.0747            | 0.0695            | -0.1734            | 0.0357           |
| EM   | -0.0103           | 0.0971           | -0.0222           | 0.0407           | -0.0828            | -0.0333           | -0.0623            | 0.0153           |
| BVSP | 0.1023            | 0.0070           | -0.0255           | -0.1352          | 0.1162             | 0.0985            | -0.0336            | -0.0054          |
| DAX  | -0.0221           | -0.1016          | -0.0043           | 0.0917           | -0.0730            | 0.0764            | -0.0694            | 0.1030           |
| FTSE | 0.0187            | -0.2235          | 0.0084            | -0.0416          | -0.1049            | 0.1379            | 0.2804             | -0.1406          |
| SP   | 0.0225            | -0.0770          | -0.0080           | -0.0572          | -0.0223            | 0.1069            | -0.0994            | 0.1101           |

Table 4:  $B_3$  for the unrestricted Financial VAR(3) model (rounded to 4 decimals).

|      | NIK | EU     | ISE     | EM      | BVSP    | DAX     | FTSE    | SP      |
|------|-----|--------|---------|---------|---------|---------|---------|---------|
| NIK  | 1   | 0.0498 | 0.0184  | -0.8995 | 0.1937  | -0.0011 | 0.0783  | -0.0307 |
| EU   | 0   | 1      | -0.0367 | -0.0178 | -0.0206 | -0.3724 | -0.5183 | -0.0133 |
| ISE  | 0   | 0      | 1       | -0.9804 | 0.1591  | -0.1218 | -0.3428 | -0.1251 |
| EM   | 0   | 0      | 0       | 1       | -0.3608 | -0.0944 | -0.2247 | 0.0933  |
| BVSP | 0   | 0      | 0       | 0       | 1       | -0.0072 | -0.2951 | -0.6417 |
| DAX  | 0   | 0      | 0       | 0       | 0       | 1       | -0.8111 | -0.2198 |
| FTSE | 0   | 0      | 0       | 0       | 0       | 0       | 1       | -0.6243 |
| SP   | 0   | 0      | 0       | 0       | 0       | 0       | 0       | 1       |

Table 5:  $A$  for the unrestricted Financial VAR(4) model (rounded to 4 decimals).

|      | NIK <sub>-1</sub> | EU <sub>-1</sub> | ISE <sub>-1</sub> | EM <sub>-1</sub> | BVSP <sub>-1</sub> | DAX <sub>-1</sub> | FTSE <sub>-1</sub> | SP <sub>-1</sub> |
|------|-------------------|------------------|-------------------|------------------|--------------------|-------------------|--------------------|------------------|
| NIK  | 0.2138            | -0.0974          | -0.1134           | 0.0946           | 0.0661             | -0.0050           | -0.1810            | -0.2739          |
| EU   | -0.0074           | 0.1709           | -0.0034           | 0.0275           | -0.0174            | -0.0457           | -0.1290            | -0.0049          |
| ISE  | 0.0391            | 0.3996           | -0.0883           | 0.2706           | -0.2750            | -0.0841           | -0.1048            | -0.1194          |
| EM   | 0.0449            | 0.0132           | -0.0052           | 0.1859           | -0.1471            | -0.1107           | 0.0334             | -0.1241          |
| BVSP | -0.0216           | 0.0668           | 0.0353            | -0.1686          | 0.1618             | -0.1512           | 0.1162             | -0.0740          |
| DAX  | -0.0219           | 0.2265           | -0.0304           | 0.0135           | -0.0389            | -0.0667           | -0.1164            | -0.0426          |
| FTSE | 0.0670            | 0.0701           | 0.0202            | 0.0797           | -0.1424            | 0.2029            | 0.1138             | -0.3800          |
| SP   | 0.0386            | 0.3503           | -0.0503           | 0.0329           | -0.0390            | -0.1336           | -0.3804            | 0.2247           |

Table 6:  $B_1$  for the unrestricted Financial VAR(4) model (rounded to 4 decimals).

|      | NIK <sub>-2</sub> | EU <sub>-2</sub> | ISE <sub>-2</sub> | EM <sub>-2</sub> | BVSP <sub>-2</sub> | DAX <sub>-2</sub> | FTSE <sub>-2</sub> | SP <sub>-2</sub> |
|------|-------------------|------------------|-------------------|------------------|--------------------|-------------------|--------------------|------------------|
| NIK  | -0.0311           | -0.1610          | -0.0411           | -0.0013          | 0.0916             | -0.0244           | 0.1471             | -0.0267          |
| EU   | -0.0014           | 0.1021           | -0.0054           | -0.0059          | 0.0059             | 0.0151            | -0.0977            | -0.0307          |
| ISE  | -0.0122           | 0.0103           | -0.0301           | -0.0176          | 0.0178             | 0.0245            | 0.0158             | 0.0484           |
| EM   | 0.0105            | 0.1257           | -0.0279           | 0.1742           | -0.1020            | -0.1019           | -0.0539            | -0.0575          |
| BVSP | -0.0582           | -0.0530          | -0.0433           | 0.1826           | -0.0191            | 0.0025            | 0.0129             | 0.0310           |
| DAX  | -0.0416           | 0.0569           | 0.0094            | 0.0651           | -0.0387            | -0.0376           | -0.0325            | 0.0237           |
| FTSE | 0.0554            | 0.3219           | -0.0490           | 0.1518           | -0.0199            | 0.0329            | -0.0277            | -0.4070          |
| SP   | 0.0293            | 0.0357           | 0.0557            | -0.1164          | 0.0473             | -0.0208           | -0.2336            | 0.1474           |

Table 7:  $B_2$  for the unrestricted Financial VAR(4) model (rounded to 4 decimals).

|      | NIK <sub>-3</sub> | EU <sub>-3</sub> | ISE <sub>-3</sub> | EM <sub>-3</sub> | BVSP <sub>-3</sub> | DAX <sub>-3</sub> | FTSE <sub>-3</sub> | SP <sub>-3</sub> |
|------|-------------------|------------------|-------------------|------------------|--------------------|-------------------|--------------------|------------------|
| NIK  | -0.0531           | -0.2655          | -0.0137           | -0.0077          | 0.0263             | 0.2438            | 0.0806             | -0.0885          |
| EU   | -0.0180           | 0.1201           | -0.0063           | -0.0397          | 0.0070             | -0.0210           | -0.0799            | 0.0051           |
| ISE  | -0.0829           | 0.0505           | 0.0051            | 0.2462           | -0.0800            | 0.0750            | -0.2471            | 0.0373           |
| EM   | 0.0068            | 0.1330           | -0.0108           | 0.0597           | -0.1000            | -0.0387           | -0.0826            | -0.0079          |
| BVSP | 0.0789            | -0.0102          | -0.0336           | -0.1602          | 0.1301             | 0.0844            | -0.0372            | 0.0454           |
| DAX  | -0.0289           | -0.0647          | -0.0024           | 0.0831           | -0.0671            | 0.0737            | -0.0960            | 0.0948           |
| FTSE | 0.0511            | -0.1609          | 0.0236            | -0.0300          | -0.1242            | 0.1388            | 0.2437             | -0.1786          |
| SP   | 0.0415            | 0.0773           | 0.0091            | -0.0292          | -0.0542            | 0.0751            | -0.2046            | 0.0872           |

Table 8:  $B_3$  for the unrestricted Financial VAR(4) model (rounded to 4 decimals).

|             | <b>NIK<sub>-4</sub></b> | <b>EU<sub>-4</sub></b> | <b>ISE<sub>-4</sub></b> | <b>EM<sub>-4</sub></b> | <b>BVSP<sub>-4</sub></b> | <b>DAX<sub>-4</sub></b> | <b>FTSE<sub>-4</sub></b> | <b>SP<sub>-4</sub></b> |
|-------------|-------------------------|------------------------|-------------------------|------------------------|--------------------------|-------------------------|--------------------------|------------------------|
| <b>NIK</b>  | -0.0317                 | 0.1020                 | 0.0500                  | -0.1574                | 0.0632                   | 0.0242                  | -0.1180                  | -0.0120                |
| <b>EU</b>   | -0.0137                 | 0.1278                 | -0.0024                 | -0.0192                | 0.0086                   | -0.0147                 | -0.1136                  | 0.0337                 |
| <b>ISE</b>  | -0.0165                 | 0.6753                 | -0.0545                 | -0.1178                | 0.0255                   | -0.0042                 | -0.5498                  | -0.0255                |
| <b>EM</b>   | -0.0152                 | 0.1687                 | 0.0072                  | 0.0793                 | -0.0464                  | -0.1043                 | -0.0692                  | -0.0451                |
| <b>BVSP</b> | -0.0043                 | -0.0138                | -0.0382                 | 0.1124                 | -0.0098                  | -0.0311                 | -0.0211                  | 0.1224                 |
| <b>DAX</b>  | -0.0242                 | 0.3387                 | -0.0247                 | 0.0818                 | 0.0135                   | -0.1580                 | -0.1484                  | -0.0309                |
| <b>FTSE</b> | 0.0101                  | 0.3182                 | -0.0251                 | 0.0320                 | -0.0407                  | -0.1010                 | -0.1596                  | -0.0831                |
| <b>SP</b>   | -0.0535                 | 0.7521                 | -0.0019                 | 0.1315                 | -0.1131                  | -0.2949                 | -0.4615                  | -0.0335                |

Table 9:  $B_4$  for the unrestricted Financial VAR(4) model (rounded to 4 decimals).

|             | <b>NIK</b> | <b>EU</b> | <b>ISE</b> | <b>EM</b> | <b>BVSP</b> | <b>DAX</b> | <b>FTSE</b> | <b>SP</b> |
|-------------|------------|-----------|------------|-----------|-------------|------------|-------------|-----------|
| <b>NIK</b>  | 1          | 0.0944    | 0.0304     | -0.8907   | 0.1867      | -0.0325    | 0.0564      | -0.0190   |
| <b>EU</b>   | 0          | 1         | -0.0357    | -0.0164   | -0.0234     | -0.3745    | -0.5173     | -0.0105   |
| <b>ISE</b>  | 0          | 0         | 1          | -0.9673   | 0.1315      | -0.1327    | -0.3485     | -0.0871   |
| <b>EM</b>   | 0          | 0         | 0          | 1         | -0.3629     | -0.0991    | -0.2192     | 0.0983    |
| <b>BVSP</b> | 0          | 0         | 0          | 0         | 1           | -0.0025    | -0.2825     | -0.6595   |
| <b>DAX</b>  | 0          | 0         | 0          | 0         | 0           | 1          | -0.8084     | -0.2217   |
| <b>FTSE</b> | 0          | 0         | 0          | 0         | 0           | 0          | 1           | -0.6253   |
| <b>SP</b>   | 0          | 0         | 0          | 0         | 0           | 0          | 0           | 1         |

Table 10:  $A$  for the unrestricted Financial VAR(5) model (rounded to 4 decimal places).

|             | <b>NIK<sub>-1</sub></b> | <b>EU<sub>-1</sub></b> | <b>ISE<sub>-1</sub></b> | <b>EM<sub>-1</sub></b> | <b>BVSP<sub>-1</sub></b> | <b>DAX<sub>-1</sub></b> | <b>FTSE<sub>-1</sub></b> | <b>SP<sub>-1</sub></b> |
|-------------|-------------------------|------------------------|-------------------------|------------------------|--------------------------|-------------------------|--------------------------|------------------------|
| <b>NIK</b>  | 0.2005                  | -0.2147                | -0.1216                 | 0.1676                 | 0.0353                   | 0.0455                  | -0.1137                  | -0.2744                |
| <b>EU</b>   | -0.0090                 | 0.1496                 | -0.0071                 | 0.0343                 | -0.0184                  | -0.0401                 | -0.1172                  | -0.0041                |
| <b>ISE</b>  | 0.0268                  | 0.2516                 | -0.1023                 | 0.3352                 | -0.3004                  | -0.0360                 | -0.0248                  | -0.1016                |
| <b>EM</b>   | 0.0418                  | -0.0120                | -0.0058                 | 0.1948                 | -0.1496                  | -0.1000                 | 0.0471                   | -0.1245                |
| <b>BVSP</b> | -0.0156                 | 0.1280                 | 0.0499                  | -0.1873                | 0.1590                   | -0.1717                 | 0.0972                   | -0.0838                |
| <b>DAX</b>  | -0.0181                 | 0.2461                 | -0.0281                 | 0.0063                 | -0.0396                  | -0.0720                 | -0.1261                  | -0.0432                |
| <b>FTSE</b> | 0.0702                  | 0.0797                 | 0.0255                  | 0.0651                 | -0.1417                  | 0.1977                  | 0.1154                   | -0.3827                |
| <b>SP</b>   | 0.0420                  | 0.2881                 | -0.0549                 | 0.0882                 | -0.0695                  | -0.0882                 | -0.3559                  | 0.2366                 |

Table 11:  $B_1$  for the unrestricted Financial VAR(5) model (rounded to 4 decimals).

|             | <b>NIK<sub>-2</sub></b> | <b>EU<sub>-2</sub></b> | <b>ISE<sub>-2</sub></b> | <b>EM<sub>-2</sub></b> | <b>BVSP<sub>-2</sub></b> | <b>DAX<sub>-2</sub></b> | <b>FTSE<sub>-2</sub></b> | <b>SP<sub>-2</sub></b> |
|-------------|-------------------------|------------------------|-------------------------|------------------------|--------------------------|-------------------------|--------------------------|------------------------|
| <b>NIK</b>  | -0.0293                 | -0.1957                | -0.0360                 | 0.0059                 | 0.0797                   | -0.0285                 | 0.2068                   | -0.0469                |
| <b>EU</b>   | -0.0021                 | 0.0821                 | -0.0039                 | -0.0112                | 0.0086                   | 0.0210                  | -0.0855                  | -0.0287                |
| <b>ISE</b>  | 0.0018                  | -0.0631                | -0.0203                 | -0.0399                | 0.0107                   | 0.0325                  | 0.1267                   | 0.0215                 |
| <b>EM</b>   | 0.0141                  | 0.1147                 | -0.0258                 | 0.1744                 | -0.1067                  | -0.0990                 | -0.0430                  | -0.0580                |
| <b>BVSP</b> | -0.0610                 | 0.0210                 | -0.0494                 | 0.2168                 | -0.0285                  | -0.0125                 | -0.0516                  | 0.0270                 |
| <b>DAX</b>  | -0.0434                 | 0.0795                 | 0.0041                  | 0.0737                 | -0.0408                  | -0.0489                 | -0.0407                  | 0.0217                 |
| <b>FTSE</b> | 0.0555                  | 0.3460                 | -0.0558                 | 0.1614                 | -0.0187                  | 0.0193                  | -0.0390                  | -0.4062                |
| <b>SP</b>   | 0.0322                  | 0.0507                 | 0.0555                  | -0.0978                | 0.0065                   | -0.0539                 | -0.2055                  | 0.1437                 |

Table 12:  $B_2$  for the unrestricted Financial VAR(5) model (rounded to 4 decimals).

|             | <b>NIK<sub>-3</sub></b> | <b>EU<sub>-3</sub></b> | <b>ISE<sub>-3</sub></b> | <b>EM<sub>-3</sub></b> | <b>BVSP<sub>-3</sub></b> | <b>DAX<sub>-3</sub></b> | <b>FTSE<sub>-3</sub></b> | <b>SP<sub>-3</sub></b> |
|-------------|-------------------------|------------------------|-------------------------|------------------------|--------------------------|-------------------------|--------------------------|------------------------|
| <b>NIK</b>  | -0.0485                 | -0.2250                | -0.0203                 | 0.0590                 | 0.0058                   | 0.2258                  | 0.1025                   | -0.1432                |
| <b>EU</b>   | -0.0154                 | 0.1032                 | -0.0054                 | -0.0392                | 0.0067                   | -0.0170                 | -0.0733                  | 0.0098                 |
| <b>ISE</b>  | -0.0861                 | 0.0448                 | 0.0036                  | 0.2904                 | -0.0902                  | 0.0890                  | -0.2141                  | -0.0349                |
| <b>EM</b>   | 0.0161                  | 0.1375                 | -0.0109                 | 0.0721                 | -0.1034                  | -0.0427                 | -0.0783                  | -0.0217                |
| <b>BVSP</b> | 0.0711                  | 0.0638                 | -0.0403                 | -0.1398                | 0.1149                   | 0.0484                  | -0.0620                  | 0.0554                 |
| <b>DAX</b>  | -0.0318                 | -0.0657                | -0.0021                 | 0.0777                 | -0.0690                  | 0.0748                  | -0.0949                  | 0.1001                 |
| <b>FTSE</b> | 0.0559                  | -0.1443                | 0.0232                  | -0.0336                | -0.1287                  | 0.1232                  | 0.2499                   | -0.1722                |
| <b>SP</b>   | 0.0572                  | 0.0886                 | 0.0017                  | 0.0276                 | -0.0751                  | 0.0801                  | -0.2076                  | 0.0568                 |

Table 13:  $B_3$  for the unrestricted Financial VAR(5) model (rounded to 4 decimals).

|             | <b>NIK</b> <sub>-4</sub> | <b>EU</b> <sub>-4</sub> | <b>ISE</b> <sub>-4</sub> | <b>EM</b> <sub>-4</sub> | <b>BVSP</b> <sub>-4</sub> | <b>DAX</b> <sub>-4</sub> | <b>FTSE</b> <sub>-4</sub> | <b>SP</b> <sub>-4</sub> |
|-------------|--------------------------|-------------------------|--------------------------|-------------------------|---------------------------|--------------------------|---------------------------|-------------------------|
| <b>NIK</b>  | 0.0511                   | 0.1260                  | 0.0729                   | -0.1399                 | 0.0349                    | 0.0228                   | -0.1169                   | -0.0730                 |
| <b>EU</b>   | -0.0057                  | 0.1137                  | -0.0035                  | -0.0167                 | 0.0100                    | -0.0168                  | -0.1068                   | 0.0362                  |
| <b>ISE</b>  | -0.0084                  | 0.6296                  | -0.0222                  | -0.0836                 | 0.0023                    | 0.0138                   | -0.4626                   | -0.1160                 |
| <b>EM</b>   | 0.0081                   | 0.1703                  | 0.0083                   | 0.0913                  | -0.0538                   | -0.1038                  | -0.0740                   | -0.0587                 |
| <b>BVSP</b> | 0.0349                   | 0.0552                  | -0.0389                  | 0.0861                  | -0.0215                   | -0.0394                  | -0.0770                   | 0.1401                  |
| <b>DAX</b>  | -0.0371                  | 0.3433                  | -0.0257                  | 0.0825                  | 0.0163                    | -0.1530                  | -0.1567                   | -0.0301                 |
| <b>FTSE</b> | 0.0353                   | 0.3214                  | -0.0299                  | 0.0265                  | -0.0380                   | -0.0919                  | -0.1761                   | -0.0843                 |
| <b>SP</b>   | -0.0202                  | 0.7968                  | -0.0009                  | 0.2056                  | -0.1360                   | -0.3020                  | -0.5138                   | -0.0805                 |

Table 14:  $B_4$  for the unrestricted Financial VAR(5) model (rounded to 4 decimals).

|             | <b>NIK</b> <sub>-5</sub> | <b>EU</b> <sub>-5</sub> | <b>ISE</b> <sub>-5</sub> | <b>EM</b> <sub>-5</sub> | <b>BVSP</b> <sub>-5</sub> | <b>DAX</b> <sub>-5</sub> | <b>FTSE</b> <sub>-5</sub> | <b>SP</b> <sub>-5</sub> |
|-------------|--------------------------|-------------------------|--------------------------|-------------------------|---------------------------|--------------------------|---------------------------|-------------------------|
| <b>NIK</b>  | 0.0542                   | -0.0360                 | -0.0291                  | 0.1412                  | -0.0106                   | -0.0629                  | 0.0902                    | -0.1685                 |
| <b>EU</b>   | 0.0062                   | -0.0936                 | 0.0054                   | 0.0057                  | 0.0090                    | 0.0010                   | 0.0648                    | 0.0002                  |
| <b>ISE</b>  | -0.0285                  | -0.3219                 | 0.0111                   | 0.1815                  | -0.0996                   | 0.0977                   | 0.3337                    | -0.1423                 |
| <b>EM</b>   | -0.0132                  | -0.0529                 | -0.0292                  | 0.0642                  | -0.0008                   | 0.0074                   | 0.0407                    | -0.0381                 |
| <b>BVSP</b> | 0.0785                   | 0.3339                  | -0.0123                  | -0.1215                 | 0.0262                    | -0.0268                  | -0.3491                   | 0.0031                  |
| <b>DAX</b>  | 0.0086                   | 0.1067                  | 0.0090                   | -0.0786                 | 0.0084                    | -0.0473                  | -0.0232                   | 0.0107                  |
| <b>FTSE</b> | 0.0468                   | 0.0859                  | -0.0150                  | -0.1292                 | 0.0648                    | -0.0196                  | -0.0496                   | -0.0353                 |
| <b>SP</b>   | -0.0990                  | 0.2042                  | 0.0313                   | 0.1087                  | 0.0108                    | -0.2593                  | 0.0295                    | -0.1462                 |

Table 15:  $B_5$  for the unrestricted Financial VAR(5) model (rounded to 4 decimals).

|                    | NIK     | NIK      | EU      | ISE      | EM       | BVSP     | DAX      | FTSE     | SP      | NIK <sub>-1</sub> | EU <sub>-1</sub> | ISE <sub>-1</sub> | EM <sub>-1</sub> | BVSP <sub>-1</sub> | DAX <sub>-1</sub> | FTSE <sub>-1</sub> | SP <sub>-1</sub> |
|--------------------|---------|----------|---------|----------|----------|----------|----------|----------|---------|-------------------|------------------|-------------------|------------------|--------------------|-------------------|--------------------|------------------|
| NIK                | 10223.1 | 0        | 0       | 0        | -8375.9  | 2126.5   | 0        | 0        | 0       | 1851.4            | -1837.6          | -874.8            | 860.8            | 755.8              | -59.0             | -1171.5            | -2721.6          |
| EU                 | 0       | 142751.0 | -6004.3 | 0        | -3845.8  | -3845.8  | -53988.4 | -75617.0 | 0       | -1869.1           | 17320.8          | -651.4            | 4333.7           | -1861.7            | -5919.4           | -13839.1           | 30.9             |
| ISE                | 0       | -6004.3  | 5869.8  | 5272.0   | -5272.0  | 1090.4   | 1330.0   | 1405.0   | -829.5  | 458.4             | 851.9            | -342.1            | 1212.4           | -1574.0            | -69.4             | 649.2              | -828.0           |
| EM                 | -8375.9 | 0        | -5272.0 | 42193.1  | -13002.6 | -13002.6 | -2713.5  | -5818.5  | 3808.5  | -1923.4           | -1699.4          | 583.6             | 1228.9           | -1826.7            | -2542.6           | 3601.4             | -292.3           |
| BVSP               | 2126.5  | -3845.8  | 1090.4  | -13002.6 | 13563.9  | 2407.9   | 2407.9   | 1761.7   | -7154.5 | 386.1             | 656.4            | 70.6              | -1785.8          | 2173.1             | -302.6            | 327.8              | -347.4           |
| DAX                | 0       | -53988.4 | 1330.0  | -2713.5  | 2407.9   | 2407.9   | 42713.2  | 12225.0  | -5213.5 | 577.4             | -2237.8          | -378.9            | -2343.1          | 525.1              | 1622.8            | 3436.5             | -982.1           |
| FTSE               | 0       | -75617.0 | 1405.0  | -5818.5  | 1761.7   | 1761.7   | 12225.0  | 70300.8  | -2613.9 | 1354.0            | -13200.2         | 1004.7            | -2649.7          | 997.8              | 7922.5            | 8556.4             | -956.2           |
| SP                 | 0       | 0        | -829.5  | 3808.5   | -7154.5  | -7154.5  | -5213.5  | -2613.9  | 15368.1 | 22.3              | -382.0           | 47.7              | 492.2            | 191.5              | -1161.3           | -2209.7            | 3342.1           |
| NIK <sub>-1</sub>  | 1851.4  | -1869.1  | 458.4   | -1923.4  | 386.1    | 386.1    | 577.4    | 1354.0   | 22.3    | 7851.5            | -923.8           | -402.5            | -8936.2          | 2553.2             | 465.8             | 1602.8             | -847.5           |
| EU <sub>-1</sub>   | -1837.6 | 17320.8  | 851.9   | -1699.4  | 656.4    | 656.4    | -2237.8  | -13200.2 | -382.0  | -923.8            | 141457.2         | -6049.3           | -1969.2          | -3528.8            | -53024.5          | -73392.9           | -517.3           |
| ISE <sub>-1</sub>  | -874.8  | -651.4   | -342.1  | 583.6    | 70.6     | 70.6     | -378.9   | 1004.7   | 47.7    | -402.5            | -6049.3          | 5534.0            | -5600.0          | 1473.6             | 1234.6            | 1313.6             | 101.7            |
| EM <sub>-1</sub>   | 860.8   | 4333.7   | 1212.4  | 1228.9   | -1785.8  | -1785.8  | -2343.1  | -2649.7  | 492.2   | -8936.2           | -1969.2          | -5600.0           | 42509.4          | -13521.8           | -2368.1           | -4855.1            | 3611.5           |
| BVSP <sub>-1</sub> | 755.8   | -1861.7  | -1574.0 | -1826.7  | 2173.1   | 2173.1   | 525.1    | 997.8    | 191.5   | 2553.2            | -3528.8          | 1473.6            | -13521.8         | 14138.3            | 2111.6            | 1213.2             | -6552.7          |
| DAX <sub>-1</sub>  | -59.0   | -5919.4  | -69.4   | -2542.6  | -302.6   | -302.6   | 1622.8   | 7922.5   | -1161.3 | 465.8             | -53024.5         | 1234.6            | -2368.1          | 2111.6             | 43042.2           | 11232.2            | -4840.1          |
| FTSE <sub>-1</sub> | -1171.5 | -13839.1 | 649.2   | 3601.4   | 327.8    | 327.8    | 3436.5   | 8556.4   | -2209.7 | 1602.8            | -73392.9         | 1313.6            | -4855.1          | 1213.2             | 11232.2           | 68572.1            | -2183.6          |
| SP <sub>-1</sub>   | -2721.6 | 30.9     | -828.0  | -292.3   | -347.4   | -347.4   | -982.1   | -956.2   | 3342.1  | -847.5            | -517.3           | 101.7             | 3611.5           | -6552.7            | -4840.1           | -2183.6            | 16525.5          |

Table 16:  $\hat{K}$  for the financial restricted VAR(1) model (entries rounded to one decimal).

|      | NIK     | NIK      | EU       | ISE      | EM       | BVSP    | DAX      | FTSE     | SP      | NIK      | EU       | ISE     | EM       | BVSP     | DAX      | FTSE     | SP       | NIK     | EU       | ISE     | EM       | BVSP    | DAX     | FTSE    | SP       |
|------|---------|----------|----------|----------|----------|---------|----------|----------|---------|----------|----------|---------|----------|----------|----------|----------|----------|---------|----------|---------|----------|---------|---------|---------|----------|
| NIK  | 10562.1 | 0        | 146641.6 | -6195.8  | 0        | -8651.5 | 2192.7   | 0        | 0       | 2121.6   | -1973.7  | -1159.9 | 1150.0   | 869.8    | -83.1    | -15063.4 | -2564.1  | -480.4  | -1950.7  | -413.0  | 279.1    | 956.9   | -513.2  | 2621.7  | -11915.3 |
| EU   | 0       | 146641.6 | -6195.8  | -6195.8  | 0        | -8651.5 | 2192.7   | -76130.7 | 0       | -562.2   | 20342.8  | -1973.7 | -1159.9  | 1150.0   | 869.8    | -83.1    | -15063.4 | -2564.1 | -480.4   | -1950.7 | -413.0   | 279.1   | 956.9   | -513.2  | 2621.7   |
| ISE  | 0       | -6195.8  | 5928.7   | -5475.2  | 4438.4   | 1       | -13532.7 | 1390.6   | 1453.3  | 223.6    | 764.0    | -416.8  | 1243.4   | -1458.4  | -107.8   | 683.9    | -889.8   | 301.4   | -1394.0  | -127.9  | -41.3    | 692.3   | 473.9   | 320.0   | 939.3    |
| EM   | -8651.5 | 0        | -5475.2  | 4438.4   | -13532.7 | 1390.6  | 1453.3   | -5885.8  | -7392.1 | -140.8   | -649.4   | 1274.1  | 1983.2   | -2872.2  | -2751.5  | 2836.2   | -889.8   | 301.4   | -1394.0  | -127.9  | -41.3    | 692.3   | 473.9   | 320.0   | 939.3    |
| BVSP | 2192.7  | -4303.9  | 1196.4   | -13532.7 | 1390.6   | 1453.3  | -5885.8  | 12475.0  | -5219.3 | -242.6   | -3438.1  | -545.6  | -1962.3  | 635.9    | 1631.9   | 9718.3   | -1732.5  | -860.8  | -3992.0  | 763.6   | 712.9    | 1523.4  | 279.8   | 715.5   | 354.8    |
| DAX  | 0       | -5585.8  | 1390.6   | -2751.5  | 2641.0   | 43706.9 | 2641.0   | 12475.0  | -5219.3 | -242.6   | -3438.1  | -545.6  | -1962.3  | 635.9    | 1631.9   | 9718.3   | -1732.5  | -860.8  | -3992.0  | 763.6   | 712.9    | 1523.4  | 279.8   | 715.5   | 354.8    |
| FTSE | 0       | -76130.7 | 1453.3   | -5885.8  | 2048.3   | 12475.0 | -5219.3  | -3705.9  | 16740.9 | -256.7   | -759.2   | -504.3  | -2942.2  | 1340.0   | 8004.8   | 9718.3   | -1732.5  | -860.8  | -3992.0  | 763.6   | 712.9    | 1523.4  | 279.8   | 715.5   | 354.8    |
| SP   | 0       | 0        | -832.8   | 3478.1   | -7392.1  | -5219.3 | -3705.9  | -3705.9  | 16740.9 | -256.7   | -759.2   | -504.3  | -2942.2  | 1340.0   | 8004.8   | 9718.3   | -1732.5  | -860.8  | -3992.0  | 763.6   | 712.9    | 1523.4  | 279.8   | 715.5   | 354.8    |
| NIK  | 2121.6  | -562.2   | 223.6    | -348.8   | -140.8   | 692.5   | -242.6   | 1261.0   | -759.2  | -523.7   | 147922.9 | -5907.5 | -5907.5  | -3995.0  | -55037.5 | -7776.2  | -1042.2  | -1902.3 | 19169.9  | -578.4  | 4473.7   | -1957.8 | 830.6   | -5135.3 | -562.4   |
| EU   | -1973.7 | 20342.8  | 764.0    | -649.4   | 692.5    | -242.6  | 1261.0   | -759.2   | -759.2  | -523.7   | 147922.9 | -5907.5 | -5907.5  | -3995.0  | -55037.5 | -7776.2  | -1042.2  | -1902.3 | 19169.9  | -578.4  | 4473.7   | -1957.8 | 830.6   | -5135.3 | -562.4   |
| ISE  | -1159.9 | -197.6   | -416.8   | 1274.1   | -19.7    | -545.6  | 1163.7   | -2942.2  | 551.7   | -8799.7  | -596.7   | -5501.6 | 44967.1  | -14040.6 | 14802.8  | 1671.4   | -608.4   | 540.9   | 1273.3   | -360.9  | 1292.6   | -1853.4 | -2978.4 | 3835.9  | -206.0   |
| EM   | 1150.0  | 3815.4   | 1243.4   | 1983.2   | 1983.2   | 1983.2  | 1983.2   | 1983.2   | 1983.2  | 1983.2   | -596.7   | -5501.6 | 44967.1  | -14040.6 | 14802.8  | 1671.4   | -608.4   | 540.9   | 1273.3   | -360.9  | 1292.6   | -1853.4 | -2978.4 | 3835.9  | -206.0   |
| BVSP | -869.8  | -2246.0  | -1458.4  | -2872.2  | 2462.0   | 635.9   | 1340.0   | 313.0    | 313.0   | 1853.6   | -3995.0  | 1111.2  | -14040.6 | 14802.8  | 1671.4   | -608.4   | 540.9    | 1273.3  | -360.9   | 1292.6  | -1853.4  | -2978.4 | 3835.9  | -206.0  | -206.0   |
| DAX  | -83.1   | 4013.1   | -107.8   | -2751.5  | -434.7   | 1631.9  | 8004.8   | -1510.7  | 459.8   | -55037.5 | 1401.6   | -3940.4 | 2179.5   | 44184.9  | 2179.5   | 44184.9  | 2179.5   | 44184.9 | 2179.5   | 44184.9 | 2179.5   | 44184.9 | 2179.5  | 44184.9 | 2179.5   |
| FTSE | -1576.9 | -15063.4 | 683.9    | 2836.2   | 527.4    | 4063.1  | 9718.3   | -7392.1  | 4869.1  | -1321.4  | -1042.2  | -608.4  | 3000.7   | -4232.7  | -5356.0  | 12870.1  | -2567.0  | 18631.9 | 30.0     | -1879.6 | 835.6    | -974.2  | 235.6   | 794.7   | 949.1    |
| SP   | -5641.1 | -1267.0  | -750.1   | -889.8   | -353.8   | -411.5  | -1732.5  | 4869.1   | -1321.4 | -1042.2  | -608.4   | 3000.7  | -4232.7  | -5356.0  | 12870.1  | -2567.0  | 18631.9  | 30.0    | -1879.6  | 835.6   | -974.2   | 235.6   | 794.7   | 949.1   | 949.1    |
| NIK  | -480.4  | 249.2    | -101.7   | 301.4    | -471.9   | -860.8  | 1396.9   | 250.0    | 1878.8  | -1902.3  | 19169.9  | 1273.3  | -1546.5  | -3.1     | 890.6    | 1573.5   | 30.0     | 7970.7  | -631.7   | -413.1  | -9114.3  | 2599.6  | 583.2   | 1413.8  | -1070.1  |
| EU   | -1950.7 | 11073.0  | -1394.0  | -1394.0  | 4003.1   | -1209.7 | -3952.0  | -1831.2  | -3206.9 | -1790.4  | 19169.9  | 1273.3  | -1546.5  | -3.1     | 890.6    | 1573.5   | 30.0     | 7970.7  | -631.7   | -413.1  | -9114.3  | 2599.6  | 583.2   | 1413.8  | -1070.1  |
| ISE  | -413.0  | -857.8   | -127.9   | -557.8   | -169.9   | 763.6   | -553.7   | 1326.2   | -1108.9 | -578.4   | 19169.9  | 1273.3  | -1546.5  | -3.1     | 890.6    | 1573.5   | 30.0     | 7970.7  | -631.7   | -413.1  | -9114.3  | 2599.6  | 583.2   | 1413.8  | -1070.1  |
| EM   | -279.1  | 692.3    | -41.3    | 3387.5   | 1523.4   | 712.9   | -2096.5  | -3463.9  | 1098.0  | 4473.7   | 1292.6   | 1384.3  | -1853.4  | 2305.3   | 920.5    | 633.1    | 235.6    | 2599.6  | -3755.5  | 1525.4  | -14041.8 | 14474.2 | 2359.6  | 43405.5 | 1299.8   |
| BVSP | 956.9   | 478.9    | 179.3    | -3219.5  | 279.8    | -730.4  | 1447.0   | 570.7    | 830.6   | -1957.8  | -1692.7  | -1853.4 | -225.7   | 1821.0   | 7504.7   | -764.7   | -764.7   | 583.2   | -52942.1 | 1288.9  | -2771.9  | 2359.6  | 43405.5 | 1299.8  | 1299.8   |
| DAX  | -513.2  | 2621.7   | 520.0    | -3258.4  | 515.5    | 3816.6  | 504.0    | -404.4   | -180.3  | 26.5     | -5135.3  | -67.4   | -2978.4  | 2305.3   | 920.5    | 633.1    | 235.6    | 2599.6  | -3755.5  | 1525.4  | -14041.8 | 14474.2 | 2359.6  | 43405.5 | 1299.8   |
| FTSE | 1507.4  | -1215.3  | 939.3    | -2218.9  | 535.1    | 3816.6  | 504.0    | -404.4   | -180.3  | 26.5     | -5135.3  | -67.4   | -2978.4  | 2305.3   | 920.5    | 633.1    | 235.6    | 2599.6  | -3755.5  | 1525.4  | -14041.8 | 14474.2 | 2359.6  | 43405.5 | 1299.8   |
| SP   | 94.4    | -5430.0  | 407.0    | -1153.4  | 354.8    | 2282.9  | -1485.6  | 3418.3   | 76.8    | -1080.8  | -15895.9 | 460.9   | 3835.9   | 573.9    | 3712.9   | 9449.1   | -2029.0  | 1413.8  | -74839.6 | 1368.6  | -4975.8  | 1299.8  | 10976.2 | 69873.1 | -1414.7  |

Table 17: The  $\hat{K}$  matrix for Financial VAR(2) (rounded to 1 decimal).

|         |             |         |             |         |             |        |           |       |            |         |         |        |           |       |             |       |            |        |           |       |            |         |           |        |           |
|---------|-------------|---------|-------------|---------|-------------|--------|-----------|-------|------------|---------|---------|--------|-----------|-------|-------------|-------|------------|--------|-----------|-------|------------|---------|-----------|--------|-----------|
| IMR     | 78193.8990  | IMR     | 78193.8990  | MMR     | 5758.0389   | HepB   | 405.7913  | GDP   | 868.5659   | OPExp   | 0.0000  | HExp   | 314.3372  | IMR-1 | -71926.1876 | MMR-1 | -4632.3622 | HepB-1 | -160.4118 | GDP-1 | 417.9827   | OPExp-1 | -104.6326 | HExp-1 | -382.7312 |
| MMR     | 5758.0389   | MMR     | 5758.0389   | MMR     | 5599.4176   | HepB   | 152.4034  | GDP   | 674.7314   | OPExp   | 0.0000  | HExp   | -36.7332  | IMR-1 | -10562.6880 | MMR-1 | 958.3424   | HepB-1 | -13.1047  | GDP-1 | 345.0612   | OPExp-1 | -32.0986  | HExp-1 | -7.8669   |
| HepB    | 405.7913    | HepB    | 152.4034    | MMR     | 152.4034    | HepB   | 18.3428   | GDP   | 14.4085    | OPExp   | 0.0000  | HExp   | 0.5283    | IMR-1 | -448.7913   | MMR-1 | -52.7652   | HepB-1 | -12.9436  | GDP-1 | 3.9675     | OPExp-1 | -2.2020   | HExp-1 | -2.7720   |
| GDP     | 868.5659    | GDP     | 674.7314    | MMR     | 674.7314    | HepB   | 14.4085   | GDP   | 238.9225   | OPExp   | 0.0000  | HExp   | -4.2284   | IMR-1 | -1346.2032  | MMR-1 | 52.9283    | HepB-1 | 12.1550   | GDP-1 | -89.7692   | OPExp-1 | 10.2742   | HExp-1 | 15.4743   |
| OPExp   | 0.0000      | OPExp   | 0.0000      | MMR     | 0.0000      | HepB   | 0.0000    | GDP   | 0.0000     | OPExp   | 1.9570  | HExp   | -1.5371   | IMR-1 | 7.1297      | MMR-1 | -7.3361    | HepB-1 | -0.2766   | GDP-1 | -0.8572    | OPExp-1 | 0.0535    | HExp-1 | -0.1811   |
| HExp    | 314.3372    | HExp    | -36.7332    | MMR     | -36.7332    | HepB   | 0.5283    | GDP   | -4.2284    | OPExp   | -1.5371 | HExp   | 7.9863    | IMR-1 | -223.5551   | MMR-1 | -45.7508   | HepB-1 | -3.2456   | GDP-1 | -3.9811    | OPExp-1 | -1.3610   | HExp-1 | -2.2841   |
| IMR-1   | -71926.1876 | IMR-1   | -10562.6880 | MMR-1   | -10562.6880 | HepB-1 | -448.7913 | GDP-1 | -1346.2032 | OPExp-1 | 7.1297  | HExp-1 | -223.5551 | IMR-1 | 75702.8848  | MMR-1 | -1917.2812 | HepB-1 | 8.6454    | GDP-1 | -1443.7150 | OPExp-1 | 88.7339   | HExp-1 | 429.3489  |
| MMR-1   | -4632.3622  | MMR-1   | 958.3424    | MMR-1   | 958.3424    | HepB-1 | -52.7652  | GDP-1 | 52.9283    | OPExp-1 | -7.3361 | HExp-1 | -45.7508  | IMR-1 | -1917.2812  | MMR-1 | 6271.0399  | HepB-1 | 186.9895  | GDP-1 | 895.9179   | OPExp-1 | 44.0174   | HExp-1 | -86.1008  |
| HepB-1  | -160.4118   | HepB-1  | -13.1047    | HepB-1  | -13.1047    | HepB-1 | -12.9436  | GDP-1 | 12.1550    | OPExp-1 | -0.2766 | HExp-1 | -3.2456   | IMR-1 | 8.6454      | MMR-1 | 186.9895   | HepB-1 | 20.2812   | GDP-1 | 16.5578    | OPExp-1 | 3.4141    | HExp-1 | -0.6124   |
| GDP-1   | 417.9827    | GDP-1   | 345.0612    | GDP-1   | 345.0612    | HepB-1 | 3.9675    | GDP-1 | -89.7692   | OPExp-1 | -0.8572 | HExp-1 | -3.9811   | IMR-1 | -1443.7150  | MMR-1 | 895.9179   | HepB-1 | 16.5578   | GDP-1 | 251.3136   | OPExp-1 | -6.2351   | HExp-1 | -29.9574  |
| OPExp-1 | -104.6326   | OPExp-1 | -32.0986    | OPExp-1 | -32.0986    | HepB-1 | -2.2020   | GDP-1 | 10.2742    | OPExp-1 | 0.0535  | HExp-1 | -1.3610   | IMR-1 | 88.7339     | MMR-1 | 44.0174    | HepB-1 | 3.4141    | GDP-1 | -6.2351    | OPExp-1 | 4.3498    | HExp-1 | -0.5391   |
| HExp-1  | -382.7312   | HExp-1  | -7.8669     | HExp-1  | -7.8669     | HepB-1 | -2.7720   | GDP-1 | 15.4743    | OPExp-1 | -0.1811 | HExp-1 | -2.2841   | IMR-1 | 429.3489    | MMR-1 | -86.1008   | HepB-1 | -0.6124   | GDP-1 | -29.9574   | OPExp-1 | -0.5391   | HExp-1 | 11.6633   |

Table 18:  $\hat{K}$  for the IMR restricted VAR(1) model of Case 2 (rounded to 4 decimals).
